# Supplementary material
Source: publisher figshare collection journal article supplement (https://acs.figshare.com/ndownloader/files/4526890)
Supplement: Supplementary file 1 [file 4526890]

## Supporting Information

### **The role of nanoparticle valency in the nondestructive magnetic-relaxation-mediated detection and magnetic isolation of cells in complex media**

*Charalambos Kaittanis,<sup>‡, #, †</sup> Santimukul Santra,<sup>‡, †</sup> J. Manuel Perez,<sup>‡, #, \*</sup>*

<sup>‡</sup>Nanoscience Technology Center, <sup>#</sup>Burnett School of Biomedical Sciences – College of Medicine,

<sup>\*</sup>Department of Chemistry, University of Central Florida, 12424 Research Parkway, Suite 400,

Orlando, FL 32826

jmperez@mail.ucf.edu

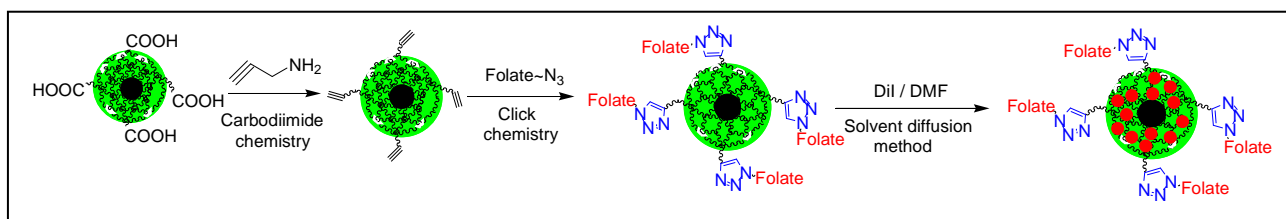

**SI Scheme 1. Schematic representation of the surface modification and folate conjugation to polyacrylic-acid-coated iron oxide nanoparticles.**

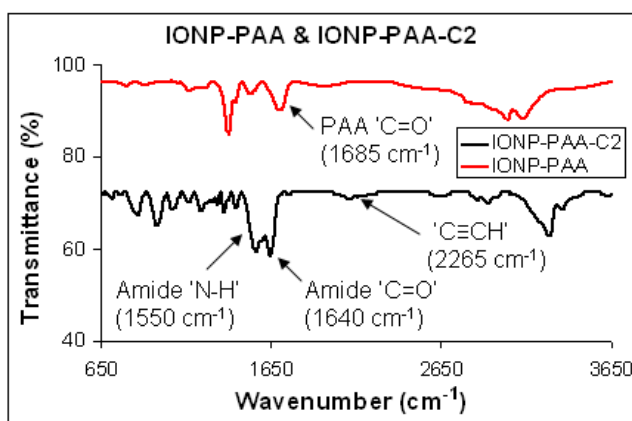

**SI Figure 1. FT-IR spectra of the unmodified and alkyne-modified polyacrylic-acid-coated iron oxide nanoparticles (PAA-IONP).**

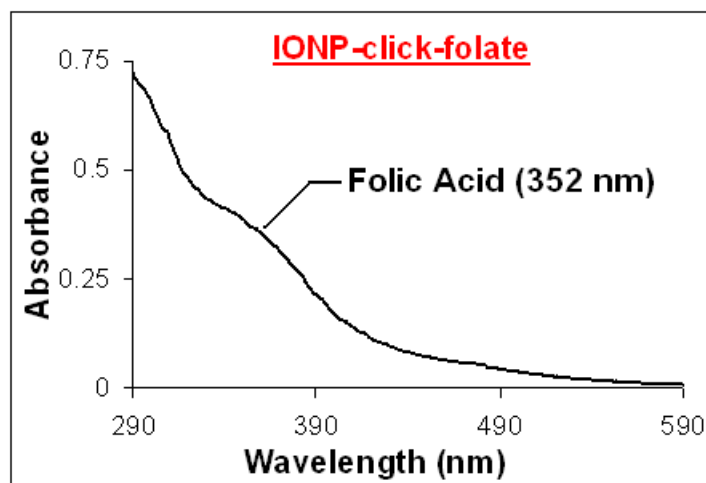

**SI Figure 2. UV/Vis spectrum of the folate-decorated iron oxide nanosensors.**

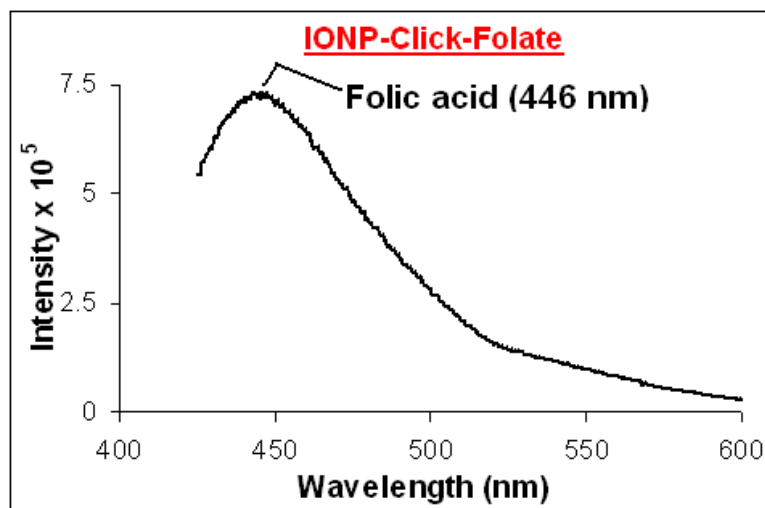

SI Figure 3. Fluorescence emission spectrum of the folate-conjugated iron oxide nanoparticles.

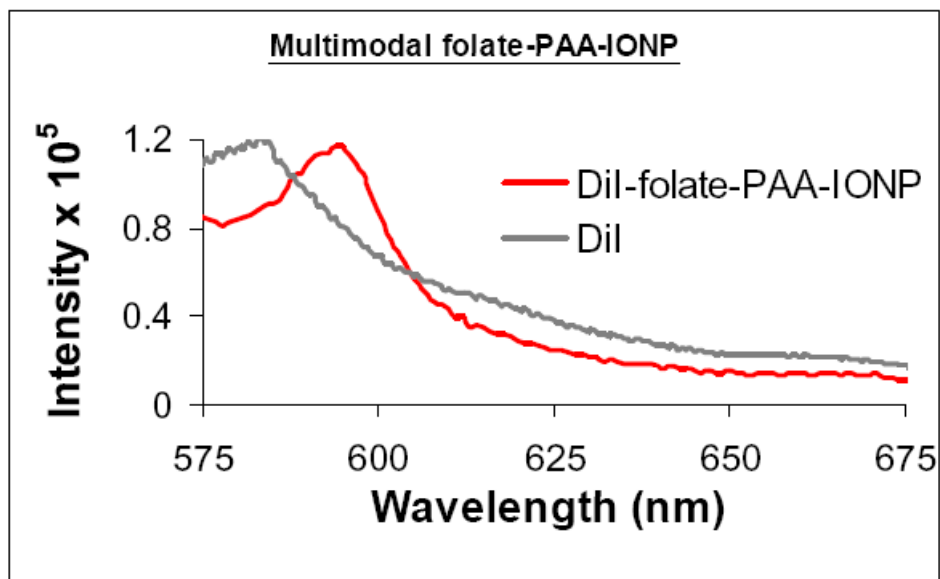

SI Figure 4. Fluorescence emission spectrum of the multimodal DiI-encapsulating folate iron oxide nanoparticles.

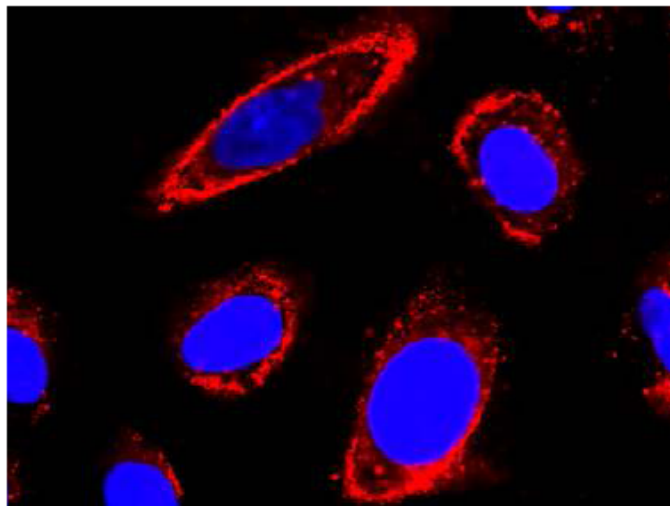

**SI Figure 5. Confocal laser-scanning microscopy indicating the association of DiI-encapsulating folate iron oxide nanoparticles with folate-receptor-expressing cells (A549). (Red: DiI, Blue: DAPI)**

**SI Table 1. Correlation coefficients of quantification curves from time-dependent magnetic relaxation studies.**

|                                                                                     | Time (mins) |      |      |      |
|-------------------------------------------------------------------------------------|-------------|------|------|------|
| Nanoparticle                                                                        | 15          | 30   | 45   | 60   |
|  | 0.79        | 0.84 | 0.87 | 0.99 |
|  | 0.94        | 0.95 | 0.96 | 0.99 |
|  | 0.76        | 0.89 | 0.94 | 0.99 |
|  | 0.55        | 0.86 | 0.92 | 0.99 |

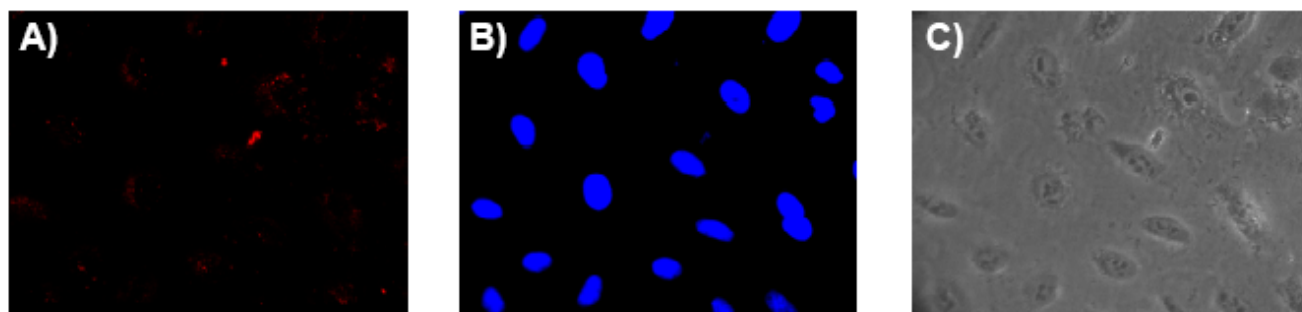

**SI Figure 6. Saturation of the culture media with excess folate prevents the association of the dye-doped folate nanoparticles with A549 cells.** The cells were incubated with the nanosensors for 2 h at 37 °C, 5% CO<sub>2</sub>. (A. Red channel – DiI, B. Blue channel – DAPI, C. Phase contrast).

**SI Table 2. Size distribution of the anti-MAP nanoparticle in the presence of various MAP concentrations.** (Means  $\pm$  SE)

|                                                                                     |               | MAP concentration |                  |
|-------------------------------------------------------------------------------------|---------------|-------------------|------------------|
| Nanoparticle                                                                        | Diameter (nm) | Low               | High             |
|  | > 100         | 29.9 $\pm$ 0.5%   | 18.4 $\pm$ 0.7%  |
|                                                                                     | < 100         | 70.1 $\pm$ 0.4%   | 81.6 $\pm$ 0.3 % |
|  | >100          | 17.8 $\pm$ 0.2%   | 22.7 $\pm$ 0.9%  |
|                                                                                     | < 100         | 82.2 $\pm$ 0.5 %  | 77.3 $\pm$ 0.6 % |

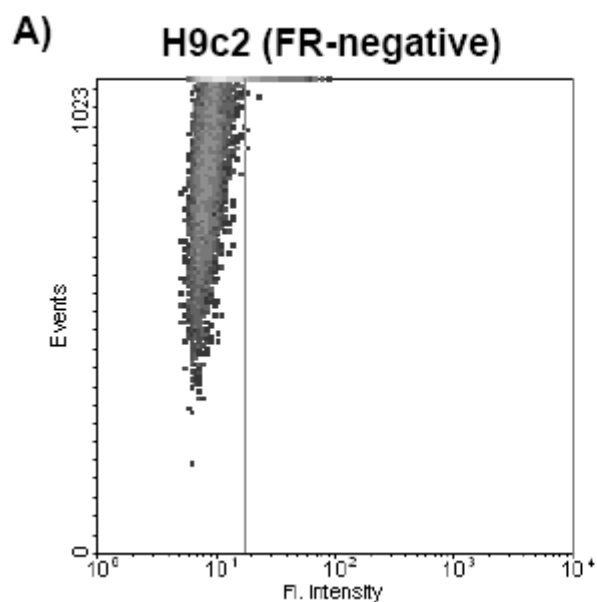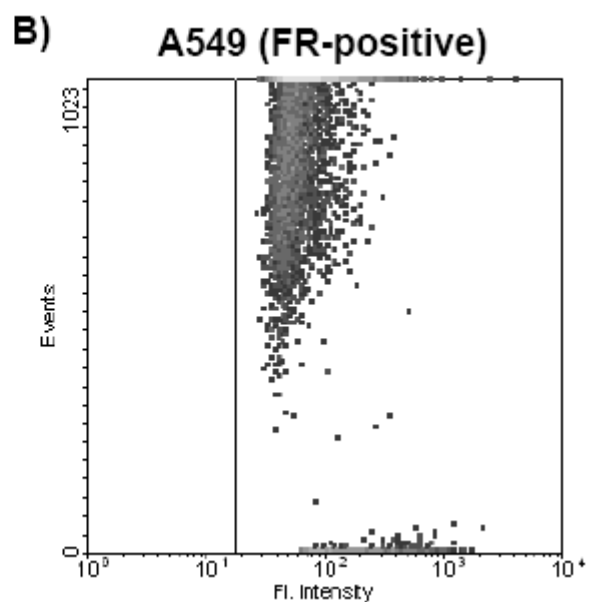

**SI Figure 7. Determination of the expression of the folate receptor on A) H9c2 and B) A549 cells using flow cytometry.**
